# Supplementary material
Source: MDPI journal article supplement (https://www.mdpi.com/2073-4344/7/9/247)
Supplement: s1 [file s1]

## Supplementary Materials

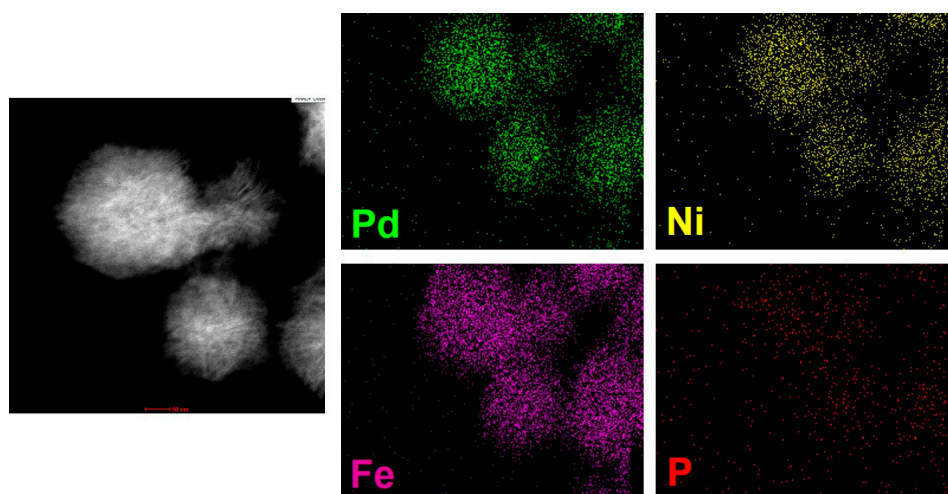

**Figure S1.** STEM-EDS elemental maps of the NPFNP-1.

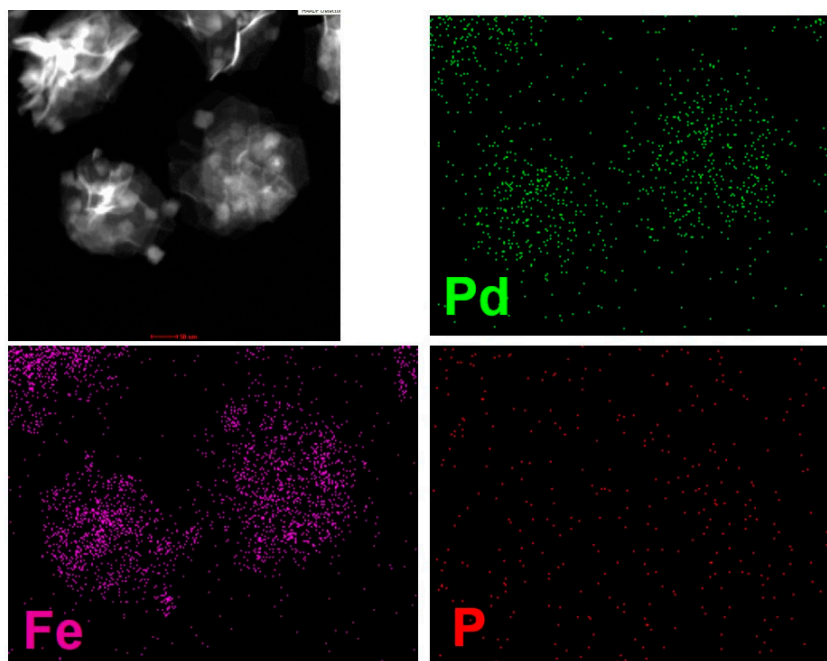

**Figure S2.** STEM-EDS elemental maps of the Pd-Fe<sub>3</sub>O<sub>4</sub>.

**Table S1.** Suzuki-Miyaura coupling reactions of 4-bromo anisole with phenylboronic acid catalyzed by NPFNP-2.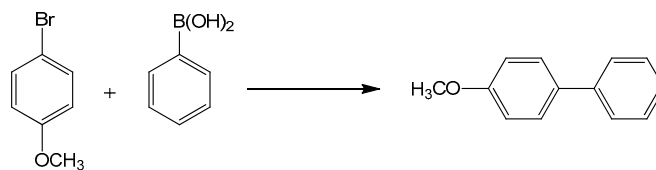

| Entry | Conversion (%) | Selectivity (%) |
|-------|----------------|-----------------|
| 1     | 57.43          | 97              |

Reaction condition: 1.3 mg of NPFNPs (0.34 mol%), 1.0 mmol of 4-bromoanisole 1.2 mmol of phenylboronic acid, 2.0 mmol of potassium carbonate, and 6.0 mL of a mixture of ethanol and water (1:1) at 50 °C for 1 h.
